# Supplementary material for: Relationship between the Blood Urea Nitrogen to Creatinine Ratio and In-Hospital Mortality in Non-Traumatic Subarachnoid Hemorrhage Patients: Based on Propensity Score Matching Method
Source: MDPI journal article supplement (doi:10.3390/jcm11237031), 2022-11-28
Supplement: s1 [file s1]

**Table S1: The best cut-off value, specificity, sensitivity and Youden Index of UCR.**

| Cut-off value | Sensitivity | 1 - Specificity | Youden Index |
|---------------|-------------|-----------------|--------------|
| 27.20779200   | 0.217       | 0.071           | 0.146        |
| 26.54761900   | 0.222       | 0.084           | 0.138        |
| 26.90476200   | 0.217       | 0.079           | 0.138        |
| 26.39610350   | 0.222       | 0.085           | 0.137        |
| 26.30681800   | 0.222       | 0.087           | 0.135        |
| 26.12500000   | 0.222       | 0.089           | 0.133        |
| 24.33035700   | 0.259       | 0.130           | 0.130        |
| 25.66964300   | 0.228       | 0.100           | 0.128        |
| 25.85714300   | 0.222       | 0.095           | 0.128        |
| 24.72222200   | 0.254       | 0.127           | 0.127        |
| 25.59027800   | 0.228       | 0.102           | 0.125        |
| 24.40972200   | 0.254       | 0.130           | 0.124        |
| 25.11904750   | 0.233       | 0.109           | 0.124        |
| 24.08333350   | 0.270       | 0.146           | 0.123        |
| 25.44444450   | 0.228       | 0.108           | 0.120        |
| 24.22619050   | 0.265       | 0.145           | 0.119        |
| 27.33201550   | 0.190       | 0.071           | 0.119        |
| 25.28571400   | 0.228       | 0.109           | 0.119        |
| 21.48351650   | 0.360       | 0.244           | 0.116        |
| 21.60256450   | 0.354       | 0.244           | 0.111        |
| 21.74242450   | 0.344       | 0.233           | 0.111        |
| 21.90909100   | 0.339       | 0.228           | 0.111        |
| 27.75000000   | 0.180       | 0.070           | 0.110        |
| 23.69318200   | 0.286       | 0.176           | 0.110        |
| 27.44565200   | 0.180       | 0.071           | 0.109        |
| 28.16666650   | 0.175       | 0.066           | 0.109        |
| 23.60389650   | 0.286       | 0.177           | 0.108        |
| 23.45238100   | 0.286       | 0.179           | 0.107        |
| 23.87500000   | 0.280       | 0.175           | 0.106        |
| 21.33928550   | 0.360       | 0.256           | 0.103        |
| 17.63888900   | 0.534       | 0.433           | 0.102        |
| 21.05555550   | 0.365       | 0.264           | 0.101        |
| 17.20779200   | 0.561       | 0.461           | 0.100        |
| 21.18055550   | 0.360       | 0.260           | 0.099        |
| 17.88888900   | 0.524       | 0.425           | 0.099        |
| 16.79487200   | 0.582       | 0.483           | 0.099        |
| 22.36111100   | 0.317       | 0.219           | 0.099        |
| 17.30303000   | 0.556       | 0.457           | 0.098        |
| 20.91666650   | 0.365       | 0.267           | 0.098        |
| 28.66071450   | 0.159       | 0.061           | 0.098        |
| 22.11111100   | 0.317       | 0.220           | 0.097        |

|             |       |       |       |
|-------------|-------|-------|-------|
| 20.77380950 | 0.365 | 0.268 | 0.097 |
| 22.79220800 | 0.312 | 0.216 | 0.096 |
| 20.35714300 | 0.365 | 0.269 | 0.096 |
| 28.45238100 | 0.159 | 0.063 | 0.095 |
| 18.66071450 | 0.471 | 0.376 | 0.095 |
| 18.78676450 | 0.460 | 0.365 | 0.095 |
| 22.61363650 | 0.312 | 0.218 | 0.095 |
| 16.30681800 | 0.614 | 0.519 | 0.094 |
| 16.39610350 | 0.608 | 0.514 | 0.094 |
| 17.41666650 | 0.550 | 0.457 | 0.093 |
| 19.04545450 | 0.450 | 0.358 | 0.092 |
| 15.10000000 | 0.693 | 0.601 | 0.092 |
| 18.45238100 | 0.476 | 0.385 | 0.091 |
| 18.94444450 | 0.450 | 0.359 | 0.091 |
| 17.07142850 | 0.571 | 0.481 | 0.091 |
| 19.18060200 | 0.439 | 0.348 | 0.091 |
| 23.20512800 | 0.291 | 0.201 | 0.090 |
| 18.85620900 | 0.455 | 0.365 | 0.090 |
| 19.11067200 | 0.439 | 0.350 | 0.089 |
| 23.03846150 | 0.291 | 0.202 | 0.089 |
| 16.54761900 | 0.603 | 0.514 | 0.089 |
| 28.87500000 | 0.148 | 0.060 | 0.089 |
| 16.96153850 | 0.571 | 0.483 | 0.088 |
| 18.09090900 | 0.497 | 0.409 | 0.088 |
| 18.28431350 | 0.492 | 0.404 | 0.088 |
| 15.26666650 | 0.688 | 0.601 | 0.087 |
| 16.13247850 | 0.624 | 0.538 | 0.087 |
| 19.36538450 | 0.434 | 0.347 | 0.087 |
| 18.20855600 | 0.492 | 0.405 | 0.087 |
| 22.91979950 | 0.296 | 0.210 | 0.086 |
| 16.05555550 | 0.624 | 0.539 | 0.085 |
| 15.35897400 | 0.683 | 0.601 | 0.082 |
| 19.51190500 | 0.429 | 0.347 | 0.081 |
| 22.99122800 | 0.291 | 0.210 | 0.081 |
| 15.77380950 | 0.651 | 0.570 | 0.081 |
| 29.50000000 | 0.138 | 0.060 | 0.078 |
| 15.43560600 | 0.677 | 0.600 | 0.078 |
| 15.50505050 | 0.672 | 0.595 | 0.077 |
| 15.40064100 | 0.677 | 0.601 | 0.076 |
| 16.20192300 | 0.614 | 0.538 | 0.076 |
| 19.76190500 | 0.423 | 0.347 | 0.076 |
| 15.85784300 | 0.640 | 0.569 | 0.072 |
| 30.16129050 | 0.116 | 0.045 | 0.071 |
| 31.16883100 | 0.111 | 0.041 | 0.070 |

|             |       |       |       |
|-------------|-------|-------|-------|
| 15.63492100 | 0.656 | 0.587 | 0.069 |
| 30.83916100 | 0.111 | 0.043 | 0.068 |
| 14.49494950 | 0.720 | 0.653 | 0.067 |
| 15.94117650 | 0.635 | 0.569 | 0.066 |
| 30.54590600 | 0.111 | 0.045 | 0.066 |
| 33.55731250 | 0.090 | 0.026 | 0.064 |
| 14.85294100 | 0.714 | 0.652 | 0.063 |
| 14.36507900 | 0.730 | 0.668 | 0.062 |
| 31.54761900 | 0.101 | 0.039 | 0.062 |
| 31.83333350 | 0.095 | 0.034 | 0.062 |
| 33.40579700 | 0.090 | 0.028 | 0.061 |
| 14.62566850 | 0.714 | 0.653 | 0.061 |
| 34.14285700 | 0.085 | 0.023 | 0.061 |
| 33.87500000 | 0.085 | 0.025 | 0.060 |
| 32.66666650 | 0.090 | 0.031 | 0.059 |
| 33.69318200 | 0.085 | 0.026 | 0.059 |
| 34.72222200 | 0.079 | 0.021 | 0.059 |
| 34.36507900 | 0.079 | 0.022 | 0.057 |
| 37.32142850 | 0.058 | 0.012 | 0.047 |
| 35.31250000 | 0.063 | 0.018 | 0.045 |
| 36.90476200 | 0.058 | 0.014 | 0.044 |
| 36.19047650 | 0.058 | 0.017 | 0.041 |
| 35.66964300 | 0.058 | 0.018 | 0.040 |
| 14.08333350 | 0.735 | 0.696 | 0.040 |
| 37.75000000 | 0.048 | 0.012 | 0.036 |
| 14.22619050 | 0.730 | 0.696 | 0.035 |
| 13.92307700 | 0.741 | 0.709 | 0.032 |
| 39.00000000 | 0.042 | 0.010 | 0.032 |
| 13.79807700 | 0.741 | 0.710 | 0.031 |
| 40.83333350 | 0.037 | 0.008 | 0.029 |
| 13.69318200 | 0.751 | 0.724 | 0.027 |
| 12.88018450 | 0.799 | 0.775 | 0.024 |
| 42.08333350 | 0.032 | 0.008 | 0.024 |
| 12.61363650 | 0.815 | 0.793 | 0.022 |
| 13.60389650 | 0.751 | 0.729 | 0.022 |
| 12.79220800 | 0.810 | 0.789 | 0.021 |
| 12.93309450 | 0.794 | 0.773 | 0.020 |
| 43.92857150 | 0.026 | 0.006 | 0.020 |
| 13.55042050 | 0.751 | 0.732 | 0.019 |
| 42.67857150 | 0.026 | 0.008 | 0.019 |
| 12.11111100 | 0.836 | 0.817 | 0.019 |
| 13.43137250 | 0.751 | 0.733 | 0.018 |
| 11.44957950 | 0.868 | 0.850 | 0.018 |
| 12.40384600 | 0.825 | 0.808 | 0.017 |

|             |       |       |        |
|-------------|-------|-------|--------|
| 12.26495700 | 0.825 | 0.810 | 0.016  |
| 12.98148150 | 0.788 | 0.773 | 0.015  |
| 45.35714300 | 0.021 | 0.006 | 0.015  |
| 11.62280700 | 0.862 | 0.848 | 0.014  |
| 13.02777800 | 0.778 | 0.764 | 0.014  |
| 11.52476750 | 0.862 | 0.850 | 0.013  |
| 46.57142850 | 0.016 | 0.004 | 0.012  |
| 45.85714300 | 0.016 | 0.005 | 0.011  |
| 13.19444450 | 0.772 | 0.764 | 0.008  |
| 53.33333350 | 0.011 | 0.003 | 0.008  |
| 49.40476200 | 0.011 | 0.004 | 0.007  |
| 71.66666650 | 0.005 | 0.000 | 0.005  |
| 11.74242450 | 0.841 | 0.837 | 0.004  |
| 59.66666650 | 0.005 | 0.001 | 0.004  |
| 55.50000000 | 0.005 | 0.003 | 0.003  |
| 10.15625000 | 0.905 | 0.904 | 0.001  |
| 11.90909100 | 0.836 | 0.835 | 0.000  |
| 81.00000000 | 0.000 | 0.000 | 0.000  |
| 4.95945950  | 0.995 | 0.999 | -0.004 |
| 10.46875000 | 0.899 | 0.904 | -0.005 |
| 10.89285700 | 0.894 | 0.899 | -0.005 |
| 4.62162150  | 0.995 | 1.000 | -0.005 |
| 8.48571450  | 0.963 | 0.969 | -0.006 |
| 8.66071450  | 0.958 | 0.964 | -0.006 |
| 8.36666650  | 0.963 | 0.970 | -0.007 |
| 10.77380950 | 0.894 | 0.902 | -0.007 |
| 9.14545450  | 0.947 | 0.955 | -0.008 |
| 11.18055550 | 0.878 | 0.886 | -0.008 |
| 10.69047650 | 0.894 | 0.903 | -0.009 |
| 11.33928550 | 0.868 | 0.877 | -0.009 |
| 10.64583350 | 0.894 | 0.904 | -0.010 |
| 10.97619050 | 0.889 | 0.899 | -0.010 |
| 9.04545450  | 0.947 | 0.959 | -0.011 |
| 8.94444450  | 0.947 | 0.960 | -0.013 |
| 11.05555550 | 0.884 | 0.896 | -0.013 |
| 9.35609750  | 0.942 | 0.955 | -0.013 |
| 8.25757550  | 0.963 | 0.978 | -0.015 |
| 8.81944450  | 0.947 | 0.962 | -0.015 |
| 8.09090900  | 0.963 | 0.979 | -0.016 |
| 6.37500000  | 0.979 | 0.996 | -0.017 |
| 9.75609750  | 0.937 | 0.955 | -0.018 |
| 6.20192300  | 0.979 | 0.997 | -0.019 |
| 5.57692300  | 0.979 | 0.999 | -0.020 |
| 6.85185200  | 0.974 | 0.995 | -0.021 |

|            |       |       |        |
|------------|-------|-------|--------|
| 7.32142850 | 0.968 | 0.990 | -0.021 |
| 6.58333350 | 0.974 | 0.996 | -0.023 |
| 7.75000000 | 0.963 | 0.987 | -0.024 |
| 7.08994700 | 0.968 | 0.995 | -0.027 |
