# Supplementary material for: Relationship between the Blood Urea Nitrogen to Creatinine Ratio and In-Hospital Mortality in Non-Traumatic Subarachnoid Hemorrhage Patients: Based on Propensity Score Matching Method
Source: MDPI journal article supplement (doi:10.3390/jcm11237031), 2022-11-28
Supplement: s1 [file s1]

**Table S2| Univariate logistic regression analyses for in-hospital mortality in patients with non-traumatic subarachnoid hemorrhage.**

| Variable                    | OR 95 CI%        | P value |
|-----------------------------|------------------|---------|
| Age                         | 1.03 (1.02~1.05) | <0.001  |
| Gender                      | 0.86 (0.62~1.18) | 0.343   |
| Ethnicity                   |                  |         |
| White                       | 0.29 (0.14~0.59) | 0.001   |
| Other                       | 0.67 (0.33~1.38) | 0.28    |
| Myocardial infarct          | 1.86 (1.12~3.09) | 0.017   |
| Congestive heart failure    | 1.94 (1.2~3.15)  | 0.007   |
| Peripheral vascular disease | 0.7 (0.39~1.27)  | 0.241   |
| Dementia                    | 0.87 (0.25~3.07) | 0.833   |
| Chronic pulmonary disease   | 1.49 (0.98~2.27) | 0.059   |
| Peptic ulcer disease        | 0.37 (0.05~2.87) | 0.34    |
| Paraplegia                  | 1.07 (0.7~1.63)  | 0.772   |
| Renal disease               | 3.29 (2.03~5.35) | <0.001  |
| Malignant cancer            | 1.77 (0.86~3.66) | 0.121   |
| Mild liver disease          | 3.85 (2.07~7.18) | <0.001  |
| Diabetes                    | 1.44 (0.97~2.15) | 0.071   |
| DCI                         | 0.39 (0.17~0.91) | 0.03    |
| Sepsis                      | 2.73 (1.94~3.85) | <0.001  |
| Vasospasm                   | 0.25 (0.1~0.63)  | 0.003   |
| HR                          | 1.02 (1.01~1.04) | <0.001  |
| SBP                         | 1 (0.99~1.01)    | 0.688   |
| DBP                         | 0.99 (0.97~1)    | 0.117   |
| MBP                         | 0.99 (0.97~1.01) | 0.396   |
| RR                          | 1.18 (1.12~1.23) | <0.001  |
| Temperature                 | 0.88 (0.66~1.18) | 0.398   |
| Spo2                        | 1.06 (0.97~1.15) | 0.197   |
| Glucose                     | 1 (1~1)          | 0.723   |
| Hemoglobin                  | 0.93 (0.87~1.01) | 0.082   |
| Platelets                   | 1 (1~1)          | 0.003   |
| WBC                         | 1.07 (1.05~1.1)  | <0.001  |
| Anion-gap                   | 1.15 (1.1~1.2)   | <0.001  |
| Bicarbonate                 | 0.95 (0.9~1)     | 0.032   |
| Calcium                     | 1.15 (0.92~1.46) | 0.224   |
| Chloride                    | 1.09 (1.06~1.12) | <0.001  |
| Sodium                      | 1.15 (1.11~1.19) | <0.001  |
| INR                         | 1.29 (1.08~1.53) | 0.005   |
| PT                          | 1.02 (1.01~1.04) | 0.006   |
| APTT                        | 1.01 (1~1.01)    | 0.008   |
| ALT                         | 1 (1~1)          | 0.072   |
| AST                         | 1 (1~1)          | 0.089   |
| OASIS                       | 1.13 (1.11~1.16) | <0.001  |
| GCS                         | 0.84 (0.81~0.88) | <0.001  |

|                         |                  |        |
|-------------------------|------------------|--------|
| SOFA                    | 1.33 (1.19~1.49) | <0.001 |
| WFNS                    |                  |        |
| II                      | 0.04 (0.02~0.1)  | <0.001 |
| III                     | 0 (0~Inf)        | 0.98   |
| IV                      | 0.27 (0.16~0.46) | <0.001 |
| V                       | 1.22 (0.8~1.85)  | 0.349  |
| Length of ICU stay      | 0.93 (0.91~0.95) | <0.001 |
| Length of hospital stay | 0.95 (0.93~0.98) | <0.001 |

---

Abbreviations: HR, heart rate; SBP, systolic blood pressure; DBP, diastolic blood pressure; MBP, mean blood pressure; RR, respiratory rate; SpO<sub>2</sub>, percutaneous oxygen saturation; DCI, delayed cerebral ischemia; UCR, BUN/creatinine; INR, international normalized ratio; PT, prothrombin time; APTT, activated partial thromboplastin time; ALT, alanine aminotransferase; AST, aspartate aminotransferase; SOFA, sequential organ failure assessment score; GCS, Glasgow coma score; OASIS, oxford acute severity of illness score; ICU, Intensive care unit; WFNS, World Federation of Neurosurgical Societies.
